# Supplementary material for: Multiple introductions and country-wide spread of DENV-2 genotype II (Cosmopolitan) in Brazil
Source: bioRxiv or medRxiv preprint supplement (doi:10.1101/2023.06.06.23290889), 2023-06-10
Supplement: Supplementary file [file media-3.pdf]

**A)**

Region

- Africa
- East Asia
- Europe
- Oceania
- South America
- South Asia
- Southeast Asia

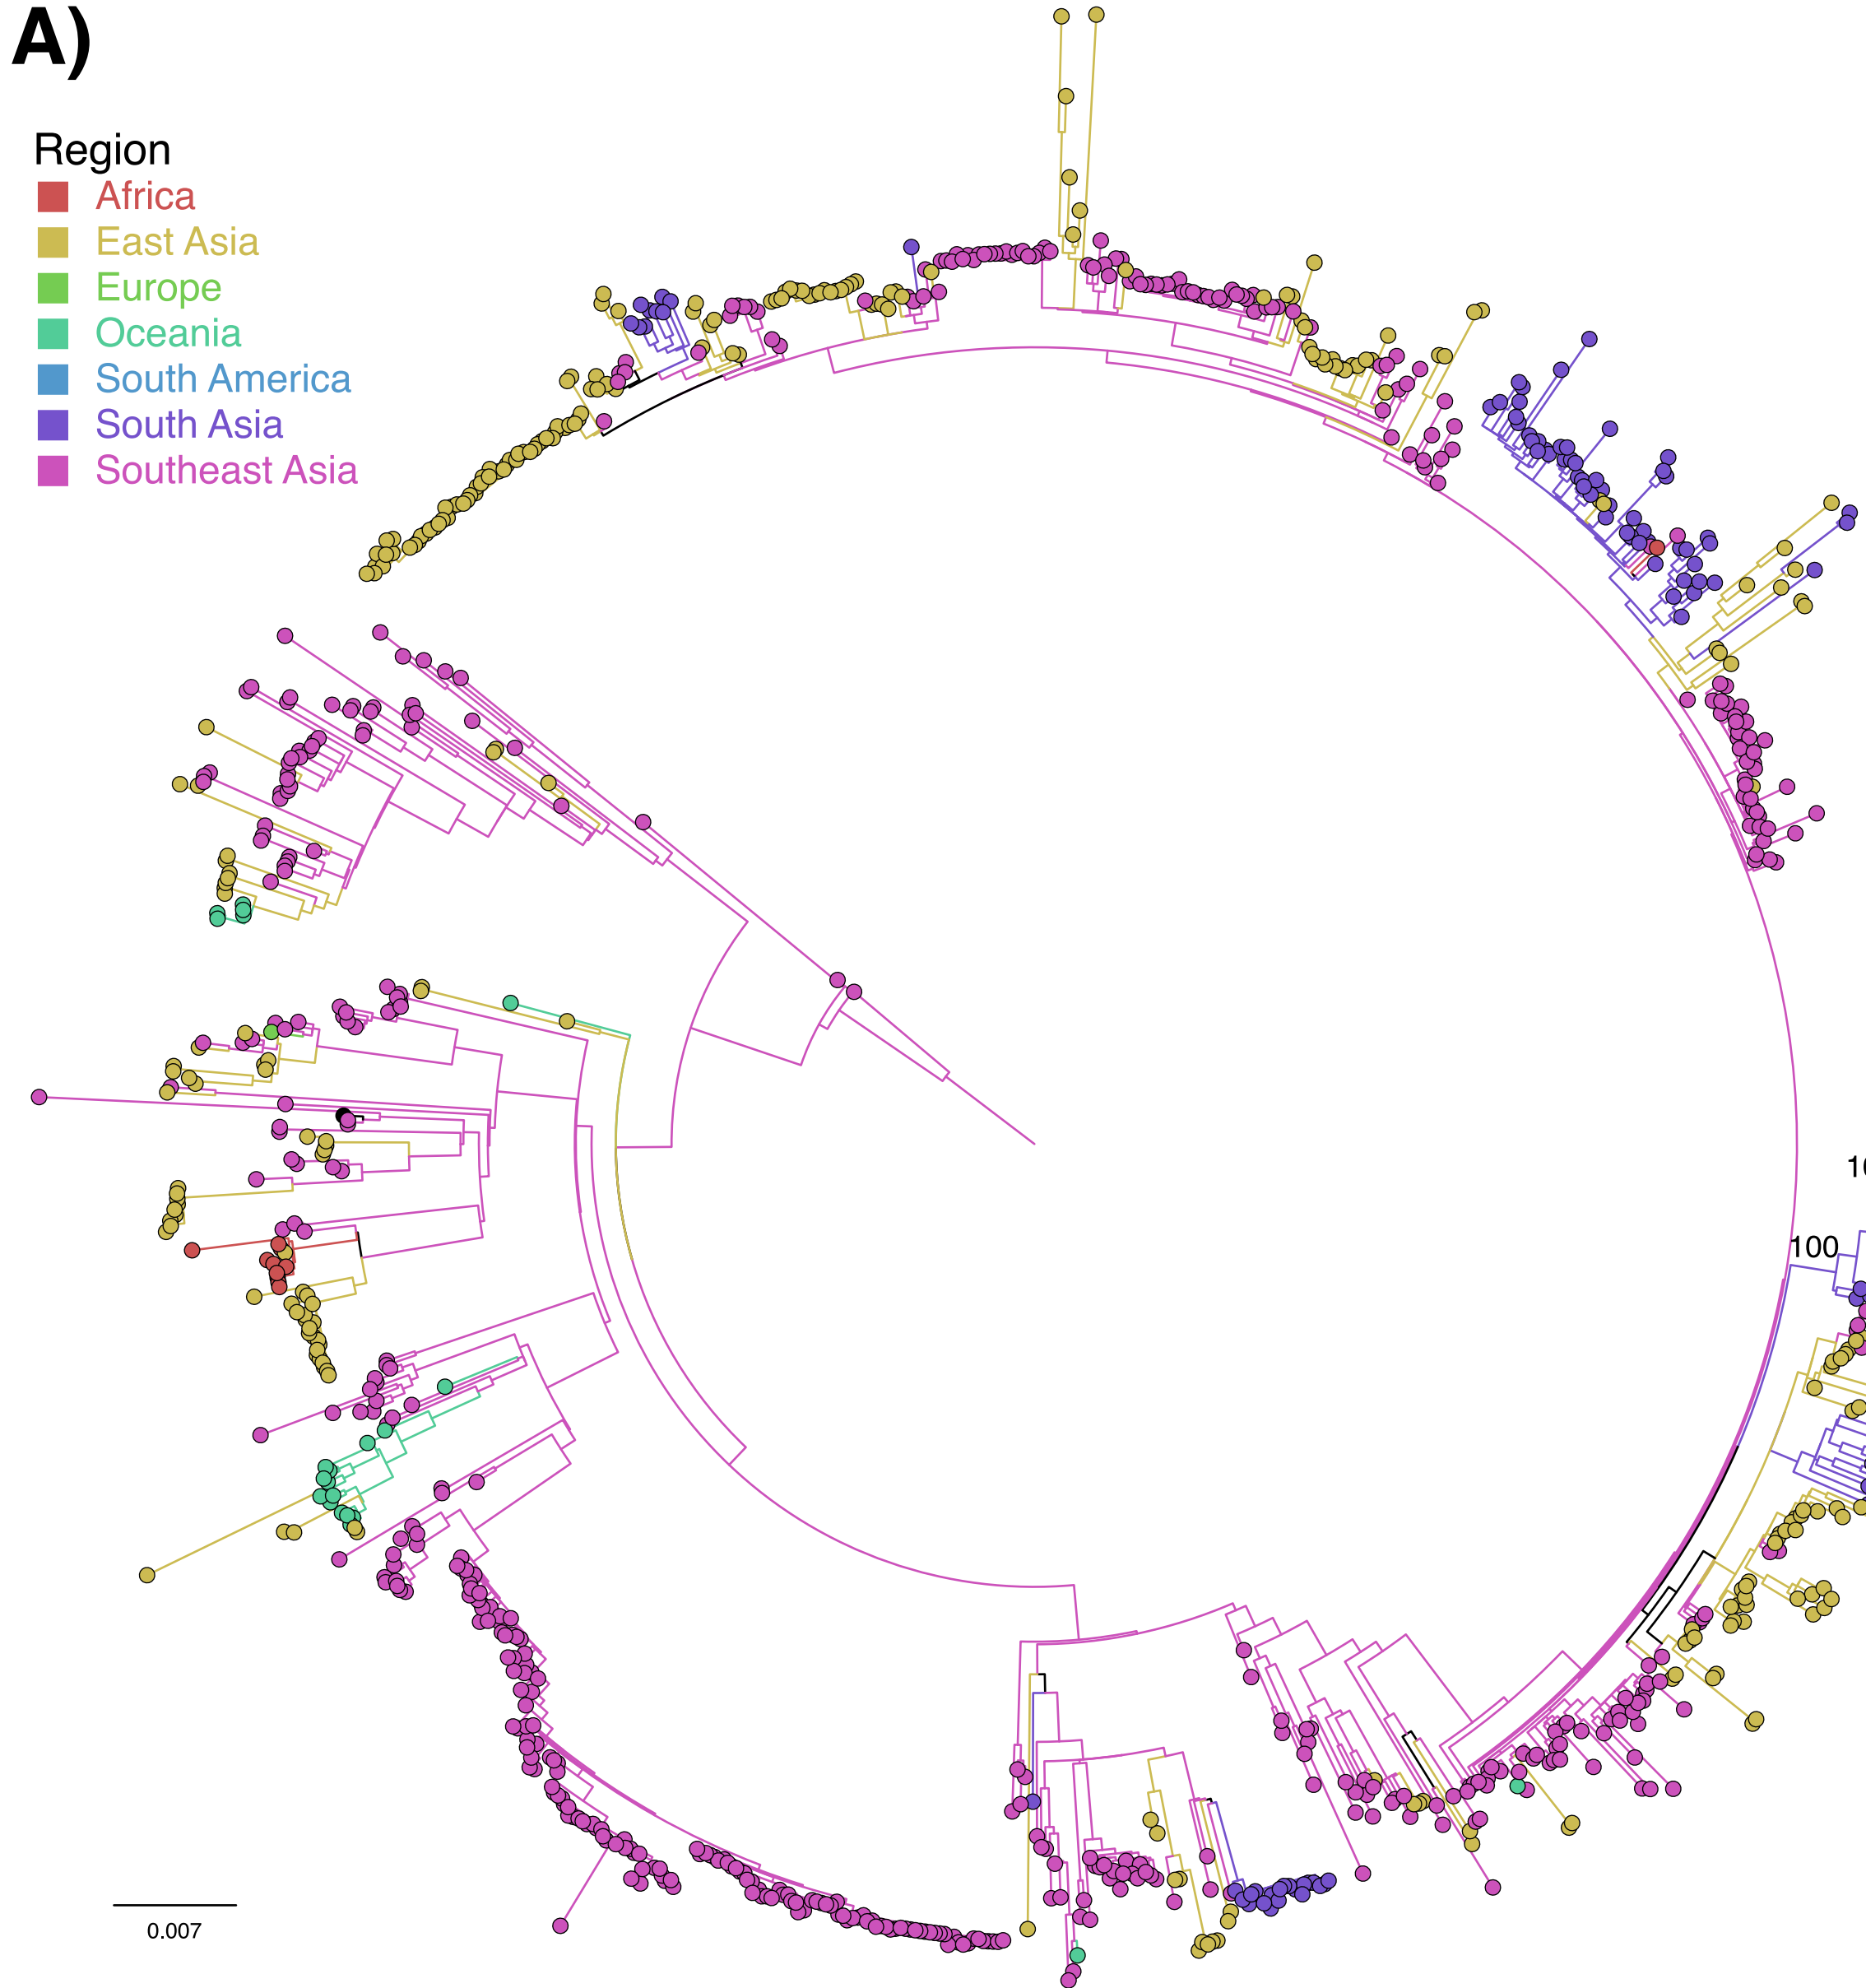**B)**

Country

- Bangladesh
- Brazil
- Peru

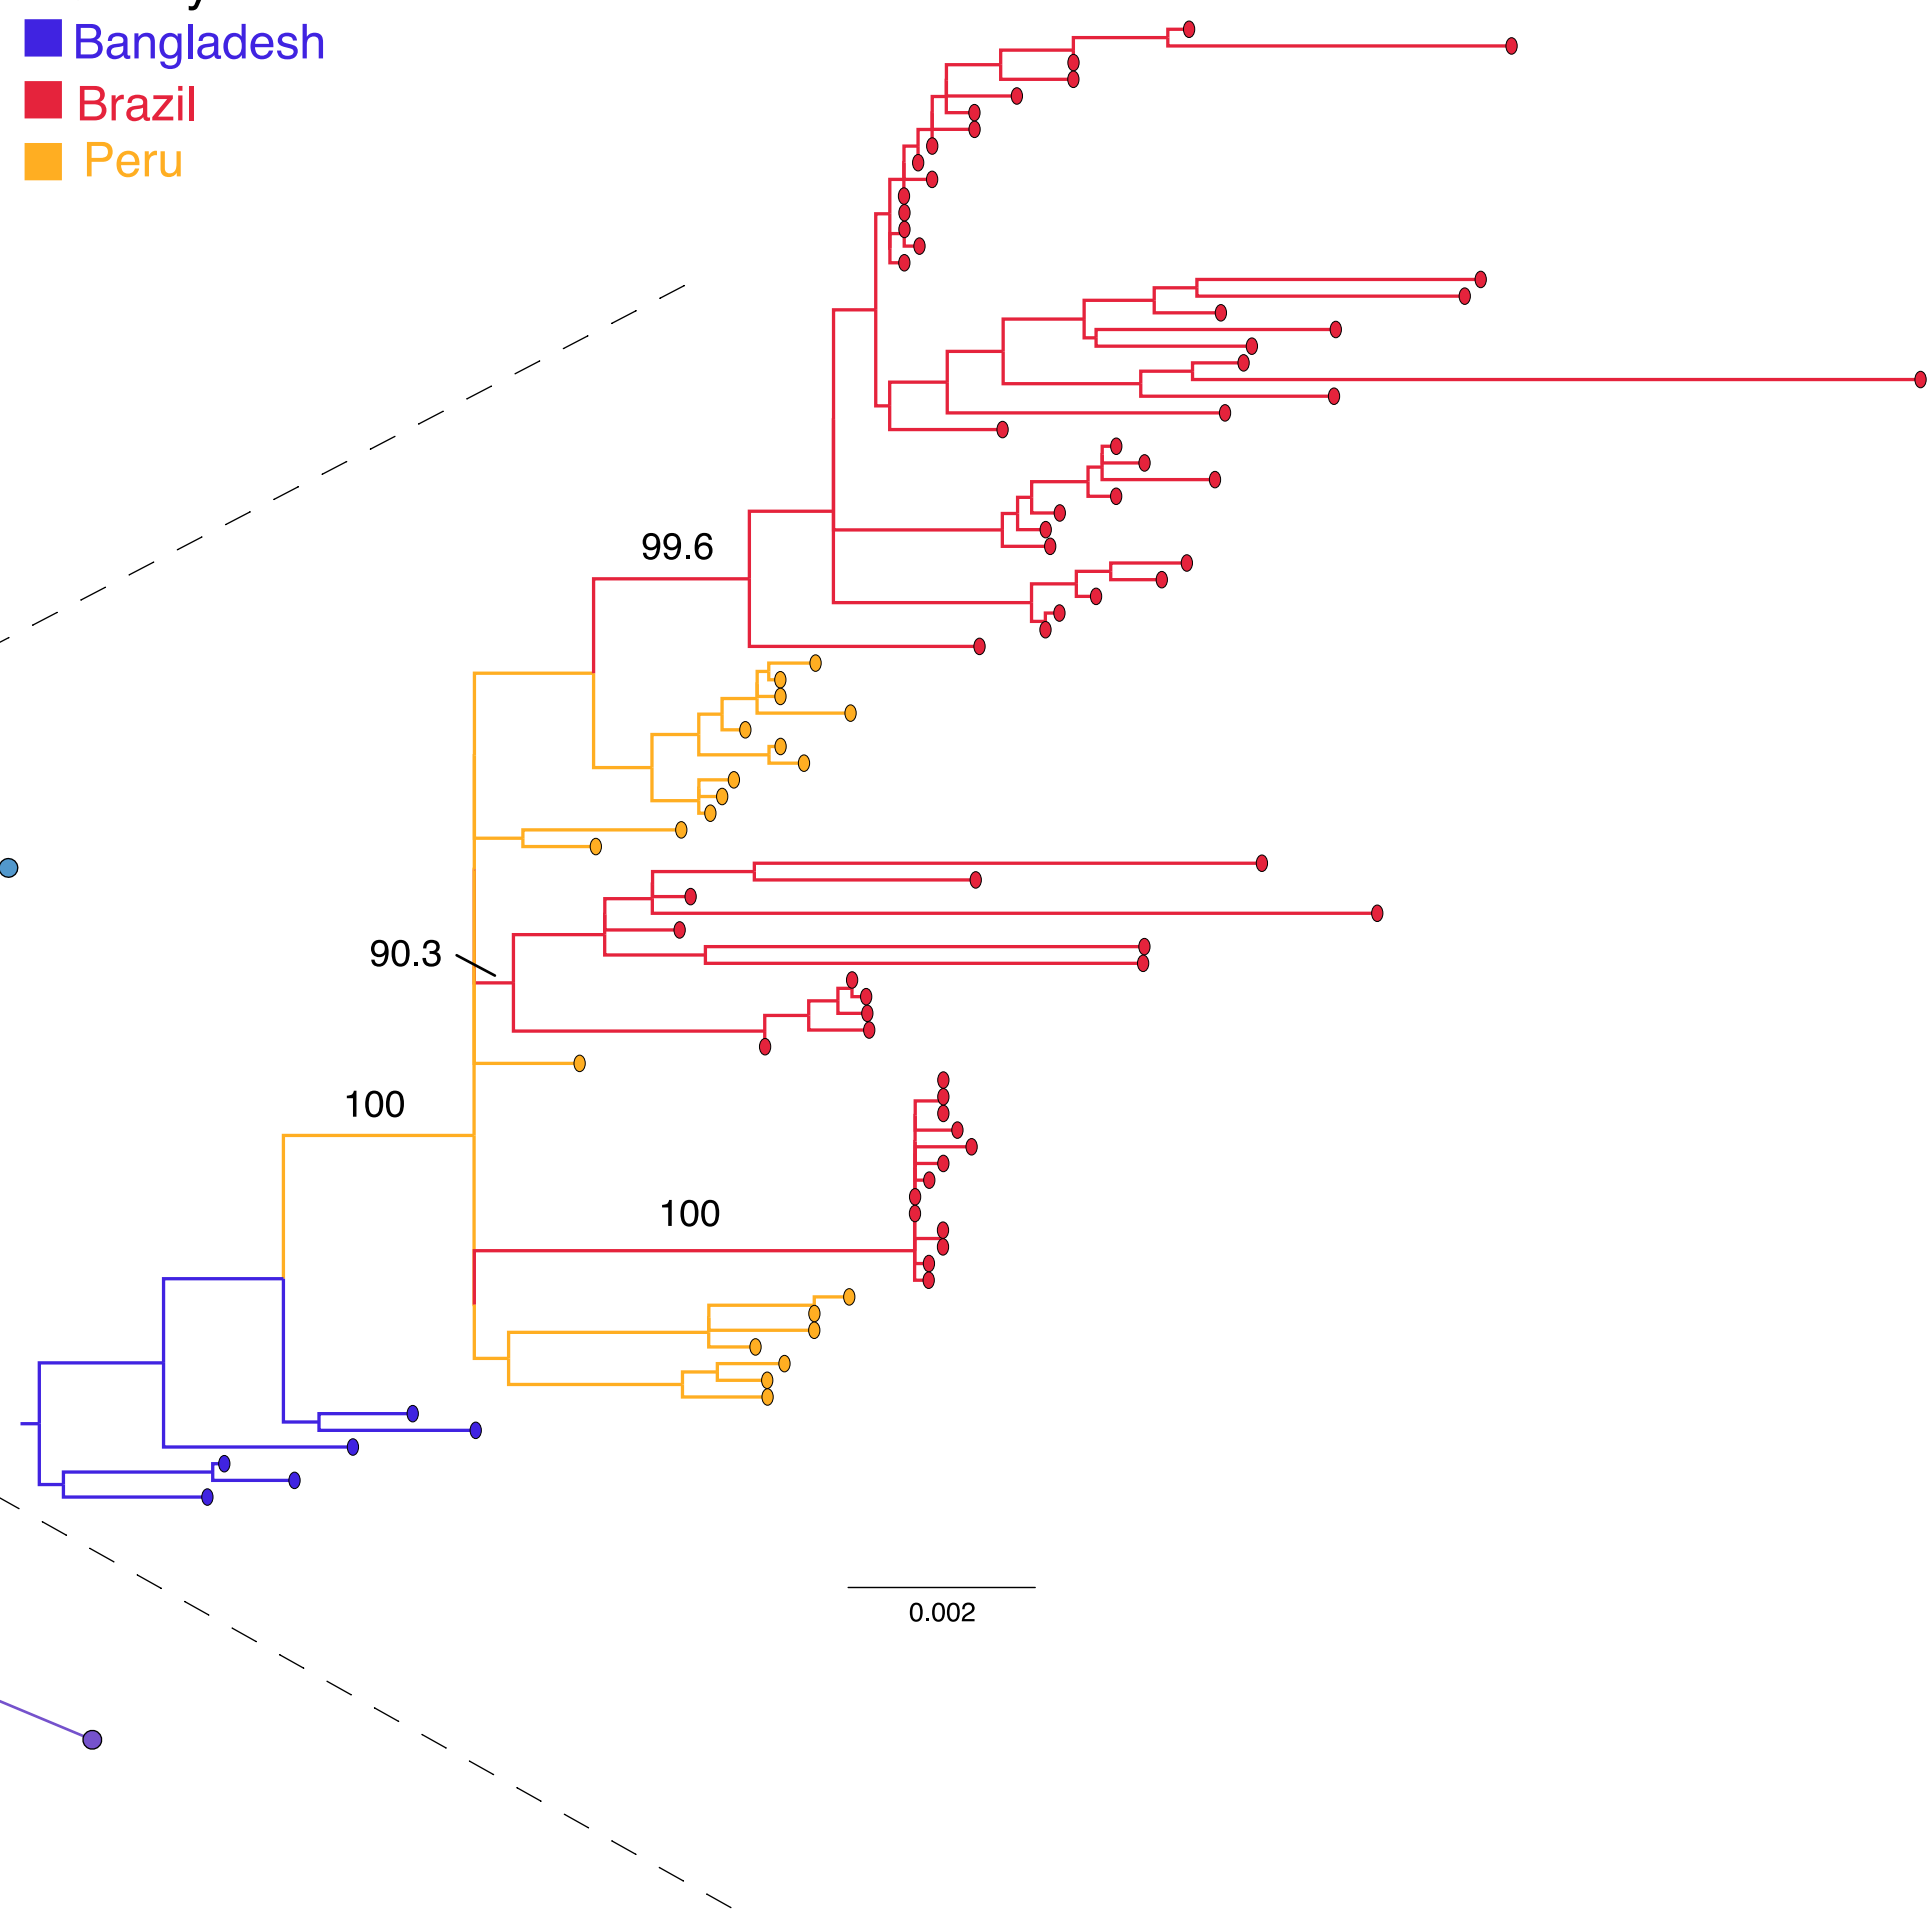

**Supplementary Figure 1. Maximum phylogenetic (ML) tree of the global diversity of DENV-2, genotype II and identified South American clade.** (a) Circular ML tree representing DENV-2, genotype II, diversity found in the world and colored according to relevant regions. (b) DENV-2, genotype II, South American clade colored according to the country of sampling and basal sequences collected in Bangladesh. Branch support for important clades are shown.
