# Supplementary material for: Multiple introductions and country-wide spread of DENV-2 genotype II (Cosmopolitan) in Brazil
Source: bioRxiv or medRxiv preprint supplement (doi:10.1101/2023.06.06.23290889), 2023-06-10
Supplement: Supplementary file [file media-4.pdf]

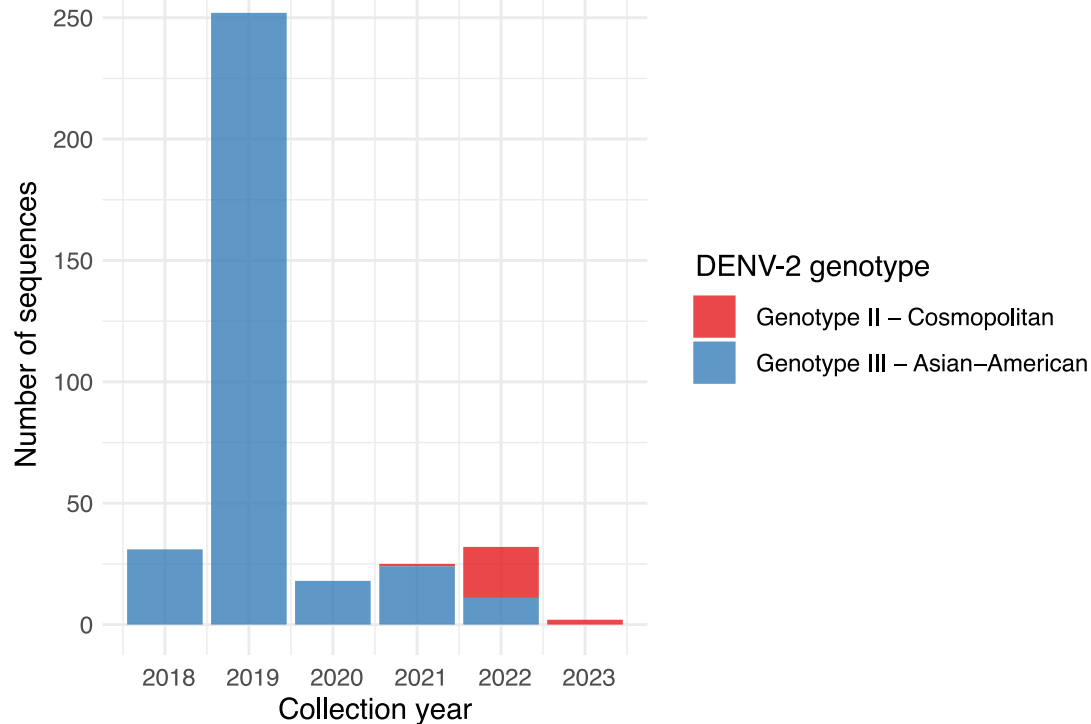

**Supplementary Figure 2. DENV-2 genotype diversity circulating in Brazil between 2018 and 2023.** All DENV-2 sequences from Brazil, as available at NCBI virus on 10th May, 2023, were classified into genotypes with online tools and collection date was aggregated in years. DENV-2 genotype is colored according to the legend.
